# Supplementary material
Source: publisher figshare collection journal article supplement (https://acs.figshare.com/ndownloader/files/5163589)
Supplement: Supplementary file 1 [file 5163589]

## **SUPPORTING INFORMATION FOR**

### **Efficient Synthesis of 3,4-Diphenyl-Substituted Maleimides from Readily Prepared Diphenylfumaronitrile Derivatives**

Hsiu-Chih Yeh, Wei-Ching, Wu, Yuh-Sheng Wen, De-Chang Dai, Juen-Kai Wang,  
and Chin-Ti Chen \*

Contribute from the Institute of Chemistry, Academia Sinica, Taipei, Taiwan 11529,  
Center for Condensed Matter Sciences, National Taiwan University, and Institute of  
Atomic and Molecular Sciences, Academia Sinica, Taipei, Taiwan 106

1. The experimental methods of integrating sphere in the determination of the solid state fluorescence quantum yields (page S2).
2. X-ray crystallographic experimental (pages S3-S4).
3. Table of X-ray crystallographic Data (page S5).
4. Crystal packing diagrams of bis(4-bromophenyl)fumaronitrile (pages S6).
5. Crystal packing diagrams of bis(4-bromophenyl)fumaronitrile (pages S7).

Three CIF files in separate files:

i5823cif: bis(4-methoxyphenyl)fumaronitrile

i5852cif: bis(4-bromophenyl)fumaronitrile

ic9246cif: bis(3-trifluoromethylphenyl)fumaronitrile

## General

The quantum yields of red emitting fluorene derivatives were determined by integrating-sphere method described by de Mello *et al.* on vacuum deposited thin films.<sup>s1</sup> HeCd laser beam (325 or 442 nm) interacts with a liquid or solid sample located inside an integrating sphere with internal diffuse white reflectance coating. Through a baffle-blocked opening, the uniformly scattered radiation is coupled to a fused-silica fiber and is detected by a spectrally-calibrated spectrometer-CCD system. We estimate the error of  $\phi_f$  by repeated measurements on several dyes with known  $\phi_f$  values. Nile Red (in 1,4-dioxane) was one of the fluorescent dyes and the corresponding  $\phi_f$  was determined as  $67\pm5\%$ , which was quite close to the literature value of  $68\%$ .<sup>s2</sup>

## References

- s1. de Mello, J. C.; Wittmann, H. F.; Friend, R. H. *Adv. Mater.* **1997**, 9, 230.
- s2. Sarkar, N.; Das, K.; Narayan, D.; Bhattachartta, K. *Langmuir* **1994**, 10, 326.

## X-ray Crystal Structure Determinations.

Single crystals of bis(4-bromophenyl)fumaronitrile, bis(3-trifluoromethylphenyl)fumaronitrile and bis(4-methoxyphenyl)fumaronitrile suitable for X-ray diffraction studies were grown by slowly evaporation of solutions of chloroform/hexane, diethyl ether/methanol, and dichloromethane containing the fumaronitriles, respectively. Data collection was carried out on a Nonius KappaCCD diffractometer for bis(3-trifluoromethylphenyl)fumaronitrile, and Enraf-nonius CAD4 diffractometer for bis(4-bromophenyl)fumaronitrile and bis(4-methoxyphenyl)fumaronitrile. The radiation of Mo K $\alpha$  radiation ( $\lambda = 0.7107$  Å) was used for three crystals. Details of the structure determination of both compounds are given in Table S1.

For bis(3-trifluoromethylphenyl)fumaronitrile, the chosen crystals were mounted on a glass fiber. Cell parameters were retrieved and refined using *DENZO-SMN* software<sup>s3a</sup> on all reflections. Data reduction was performed with the *DENZO-SMN* software.<sup>s3a</sup> An empirical absorption was based on the symmetry-equivalent reflections and applied the data using the *SORTAV* program.<sup>s3b</sup> Using *SHELXTL* program on PC computer made the structure analysis. The structure was solved using the *SHELXS-90* program<sup>s3c</sup> and refined using *SHELXL-97* program<sup>s3d</sup> by full-matrix least squares on  $F^2$  values. All of non-hydrogen atoms are refined anisotropically. Hydrogen atoms attached to the carbons were fixed at calculated positions and refined using a riding mode. For bis(4-bromophenyl)fumaronitrile and bis(4-methoxyphenyl)fumaronitrile, unit cell parameters were obtained by a least-squares fit to the automatically centered settings for 25 reflections. Intensity data were collected by using  $\omega/2\theta$  scan mode. Corrections were made for Lorentz

and polarisation effects. The structures were solved by direct methods *SHELX-97*.<sup>10d</sup> All non-hydrogen atoms were located from the difference Fourier maps and were refined by full-matrix least-squares procedures. Hydrogen atoms were calculated and refined with an overall isotropic temperature factor. Calculations and full-matrix least-squares refinements were performed utilizing the *WINGX* program package.<sup>s3e</sup>

## Reference

s3. (a) Otwinowski, Z.; Minor, W. Proceeding of X-ray Diffraction Data Collected in Oscillation Method. In *Methods in Enzymology, Vol. 276: Macromolecular Crystallography, Part A*; Carter, C. W.; Jr., Sweet, R. M. Eds.; Academic Press: New York, 1997; pp. 307-326. (b) Blessing, R. H., *Acta Cryst., Sect. A* **1995**, *51*, 33. (c) Sheldrick, G. M., *Acta Cryst., Sect. A* **1990**, *46*, 467. (d) Sheldrick, G. M., *SHELXL-97*, University of Göttingen, Germany, 1997. (e) Farrugia, L. J. *J. Appl. Cryst.* **1999**, *32*, 837.

**Table S1.** Crystallographic Data for bis(4-bromophenyl)fumaronitrile (A), bis(3-trifluoromethylphenyl)fumaronitrile (B), and bis(4-methoxyphenyl)fumaronitrile (C)

|                                                                                                    | A                                                             | B                                                            | C                                                             |
|----------------------------------------------------------------------------------------------------|---------------------------------------------------------------|--------------------------------------------------------------|---------------------------------------------------------------|
| Chemical formula                                                                                   | C <sub>16</sub> H <sub>8</sub> Br <sub>2</sub> N <sub>2</sub> | C <sub>18</sub> H <sub>8</sub> F <sub>6</sub> N <sub>2</sub> | C <sub>18</sub> H <sub>14</sub> N <sub>2</sub> O <sub>2</sub> |
| Formula Weight                                                                                     | 434.01                                                        | 366.26                                                       | 290.31                                                        |
| Temperature (K)                                                                                    | 300(2)                                                        | 150(1)                                                       | 300(2)                                                        |
| Space group                                                                                        | <i>P</i> -1                                                   | <i>P</i> 2 <sub>1</sub> / <i>n</i>                           | <i>P</i> 2 <sub>1</sub> / <i>n</i>                            |
| <i>a</i> (Å)                                                                                       | 7.9926(9)                                                     | 8.0331(10)                                                   | 3.907(1)                                                      |
| <i>b</i> (Å)                                                                                       | 9.4626(12)                                                    | 11.967(2)                                                    | 23.189(2)                                                     |
| <i>c</i> (Å)                                                                                       | 10.6914(15)                                                   | 8.7219(13)                                                   | 8.020(1)                                                      |
| $\alpha$ (°)                                                                                       | 92.131(11)                                                    | 90                                                           | 90                                                            |
| $\beta$ (°)                                                                                        | 110.063(10)                                                   | 115.331(7)                                                   | 97.83(1)                                                      |
| $\gamma$ (°)                                                                                       | 74.017(10)                                                    | 90                                                           | 90                                                            |
| <i>V</i> (Å <sup>3</sup> )                                                                         | 728.70(16)                                                    | 758.34(19)                                                   | 719.8                                                         |
| <i>Z</i>                                                                                           | 2                                                             | 2                                                            | 2                                                             |
| $\rho_{\text{calc}}$ (g/cm <sup>3</sup> )                                                          | 1.769                                                         | 1.604                                                        | 1.339                                                         |
| $\mu$ (mm <sup>-1</sup> )                                                                          | 5.552                                                         | 0.148                                                        | 0.089                                                         |
| <i>F</i> (000)                                                                                     | 376                                                           | 368                                                          | 304                                                           |
| $\lambda$ (Mo K $\alpha$ ) (Å)                                                                     | 0.71073                                                       | 0.71073                                                      | 0.71073                                                       |
| <i>R</i> ( <i>F</i> <sub>o</sub> ) <sup>a</sup> ( <i>I</i> > 2 $\sigma$ ( <i>I</i> ))              | 0.0259                                                        | 0.0507                                                       | 0.0319                                                        |
| <i>R</i> <sub>w</sub> ( <i>F</i> <sub>o</sub> ) <sup>b</sup> ( <i>I</i> > 2 $\sigma$ ( <i>I</i> )) | 0.0569                                                        | 0.1121                                                       | 0.0811                                                        |
| Reflection collected                                                                               | 2758                                                          | 3717                                                         | 1454                                                          |
| Unique reflections                                                                                 | 2559                                                          | 1330                                                         | 1263                                                          |
| Absorption correction                                                                              | Psi-scan                                                      | Semi-empirical from equivalents                              | Psi-scan                                                      |
| Refinement on                                                                                      | <i>F</i> <sup>2</sup>                                         | <i>F</i> <sup>2</sup>                                        | <i>F</i> <sup>2</sup>                                         |
| Parameters refined                                                                                 | 182                                                           | 119                                                          | 101                                                           |
| Goodness-of-fit on <i>F</i> <sup>2</sup>                                                           | 1.047                                                         | 1.046                                                        | 1.070                                                         |

<sup>a</sup>  $R = \Sigma ||F_o| - |F_c|| / \Sigma |F_o|$ . <sup>b</sup>  $R_w = [\Sigma \{w(F_o^2 - F_c^2)^2\} / \Sigma \{w(F_o^2)^2\}]^{1/2}$ .

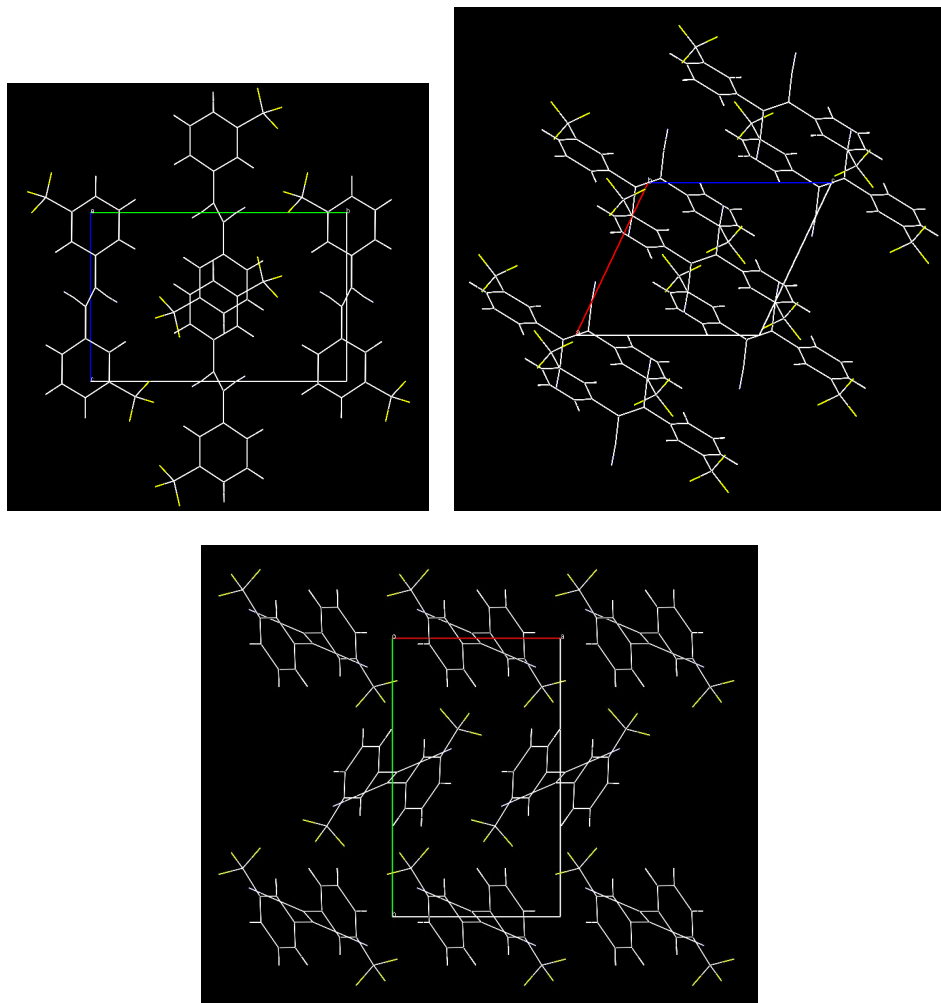

**FIGURE S1.** Crystal packing diagrams of bis(3-trifluoromethylphenyl)fumaronitrile viewing along *a*-axis (top left), *b*-axis (top right), and *c*-axis (bottom).

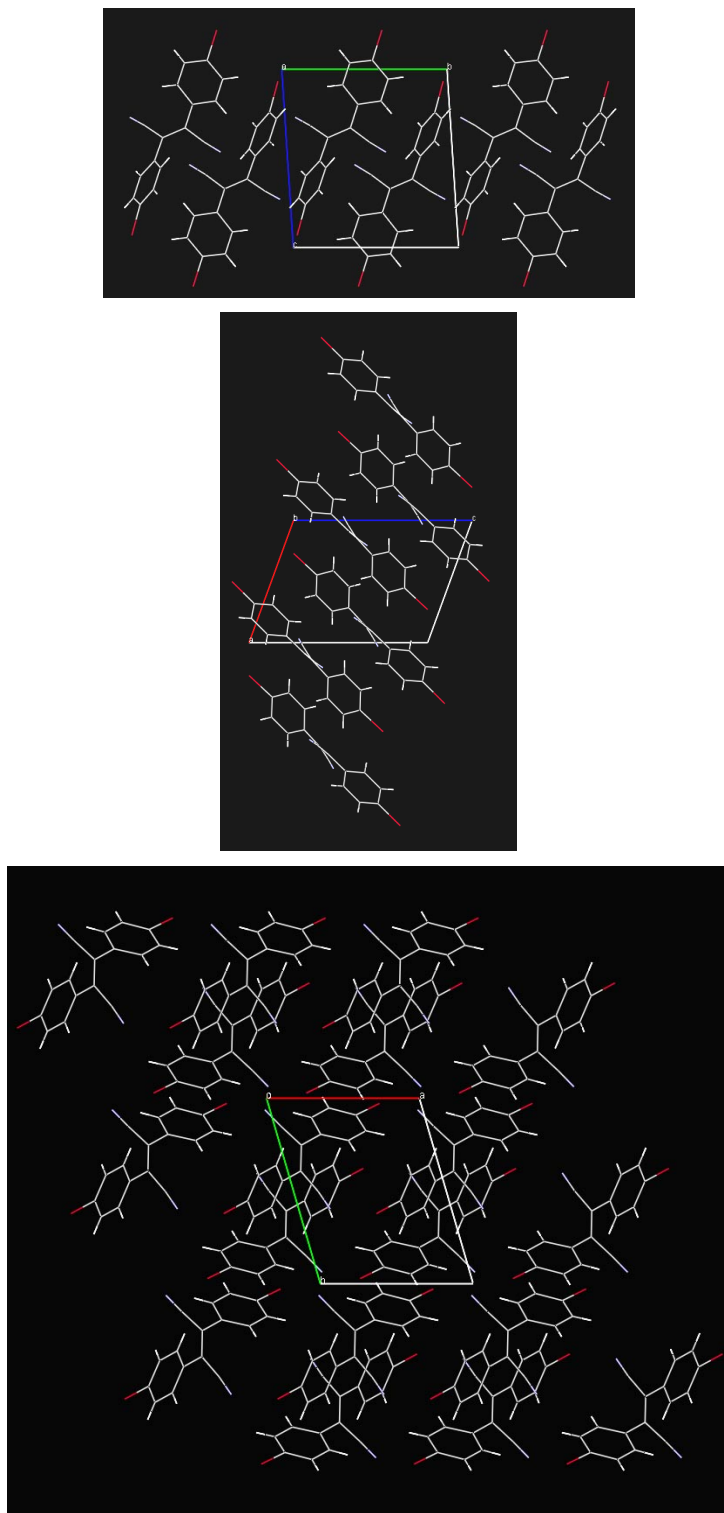

**FIGURE S2.** Crystal packing diagrams of bis(4-bromophenyl)fumaronitrile viewing along *a*-axis (top), *b*-axis (center), and *c*-axis (bottom).
